# Supplementary material
Source: PubMed Central journal article supplement (PMC8419685)
Supplement: EMBR-22-e52547-s009.pdf [file EMBR-22-e52547-s009.pdf]

## Expanded View Figures

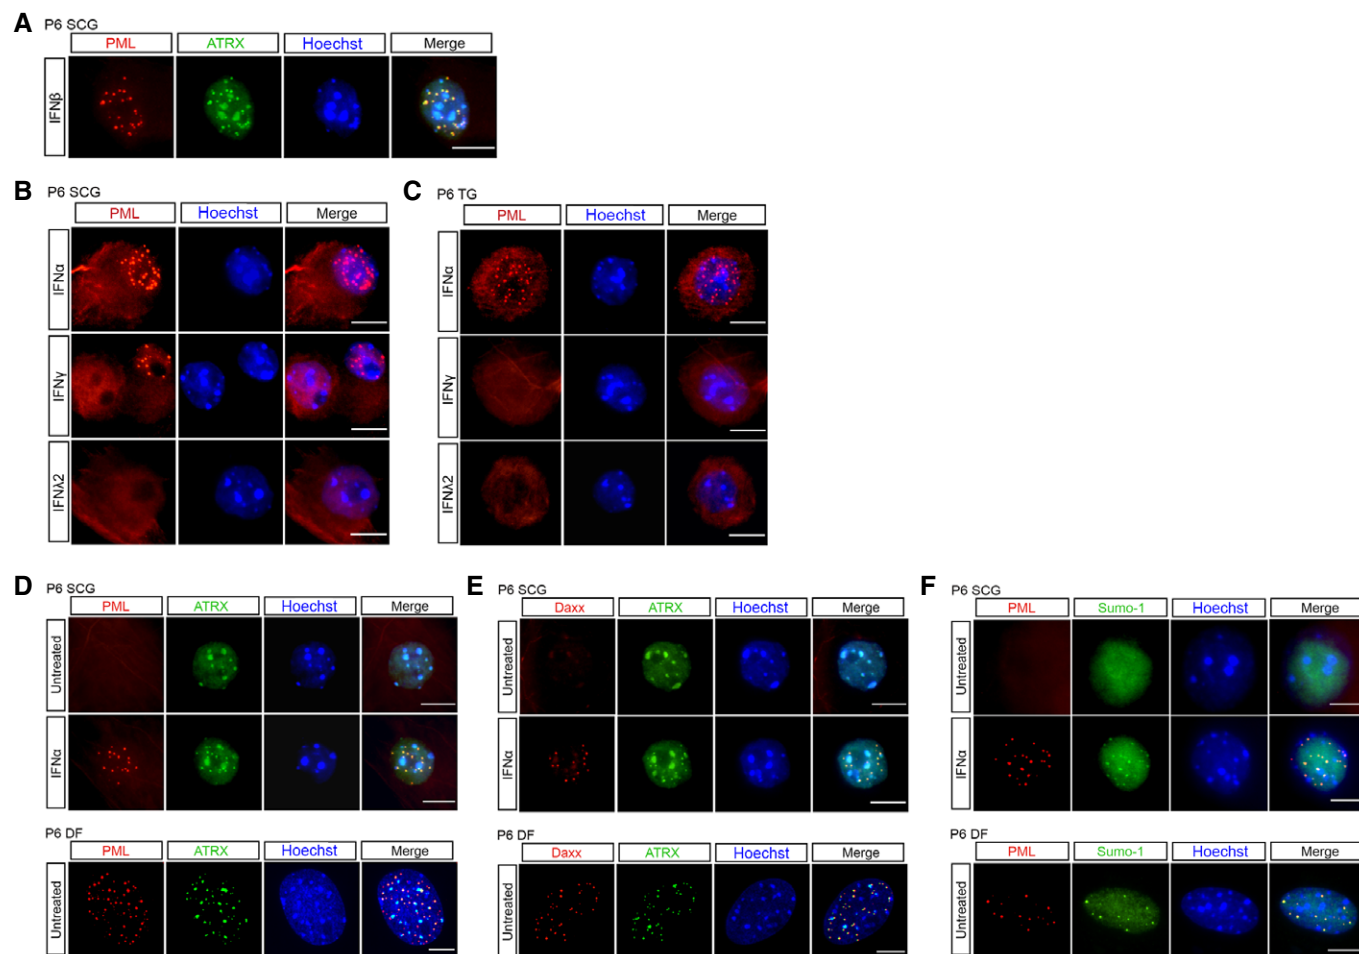

**Figure EV1. Type I IFN alters the sub-cellular localization of ATRX, Daxx, and SUMO-1 in primary peripheral neurons.**

**A** Representative images of P6 SCG neurons treated with IFN $\beta$  (150 IU/ml) and stained for PML and ATRX.

**B** Representative images of P6 SCG treated with IFN $\alpha$  (600 IU/ml), IFN $\gamma$  (500 IU/ml) and IFN $\lambda$ 2 (500 ng/ml) and stained for PML.

**C** Representative images of P6 TG treated with IFN $\alpha$  (600 IU/ml), IFN $\gamma$  (500 IU/ml), and IFN $\lambda$ 2 (500 ng/ml) and stained for PML.

**D–F** Representative images of untreated or IFN $\alpha$  (600 IU/ml)-treated P6 SCG neurons stained for PML and ATRX (**D**), Daxx and ATRX (**E**), and PML and SUMO-1 (**F**). P6 dermal fibroblasts (DF) isolated from the same mice were used as a non-neuronal control (**D–F**).

Data information: Scale bars, 20  $\mu$ m.

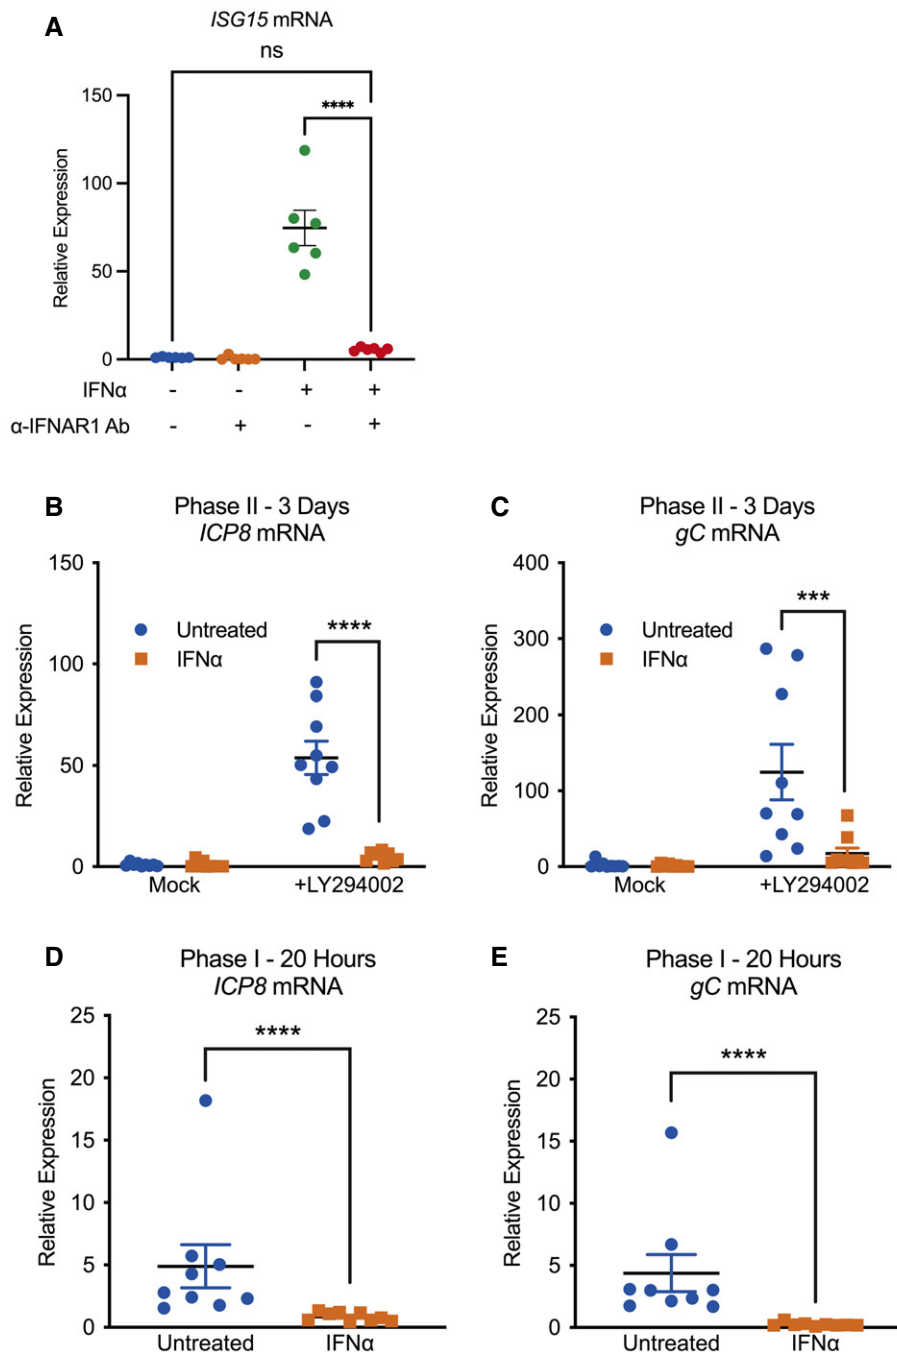

**Figure EV2. Type I IFN treatment solely at time of infection inhibits LY294002-mediated reactivation of HSV-1 in primary sympathetic SCG neurons.**

- A RT-qPCR for *ISG15* mRNA expression in SCG neurons treated with IFN $\alpha$  (600 IU/ml) in the presence or absence of anti-mouse IFNAR1 antibody (1:1,000).  $n = 6$  biological replicates.
- B, C RT-qPCR for viral mRNA transcripts at 3 days post-LY294002-induced reactivation of SCGs infected with HSV-1 in the presence or absence of IFN $\alpha$  (600 IU/ml).  $n = 9$  biological replicates.
- D, E RT-qPCR for viral mRNA transcripts at 20 h post-LY294002-induced reactivation in SCGs infected with HSV-1 in the presence or absence of IFN $\alpha$  (600 IU/ml).  $n = 9$  biological replicates.

Data information: Data represent the mean  $\pm$  SEM. Statistical comparisons were made using a one-way ANOVA with Tukey's multiple comparison (A) or a Mann-Whitney test (ns not significant, \*\*\* $P < 0.001$ , \*\*\*\* $P < 0.0001$ ).

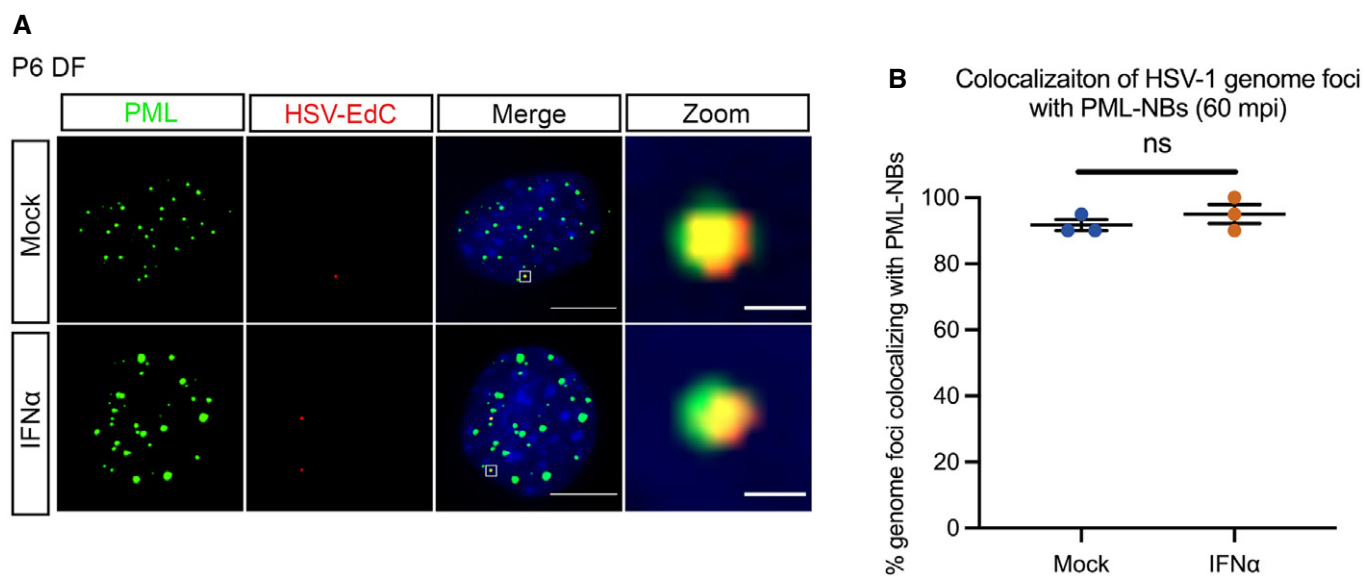

**Figure EV3. PML-NBs entrap vDNA in the absence of type I IFN during lytic HSV-1 infection of murine dermal fibroblasts.**

A Representative images of vDNA foci detected by click chemistry to PML at 60 min post-infection in P6 dermal fibroblasts lytically infected with HSV-1<sup>EdC</sup> in the presence or absence of IFN $\alpha$  (600 IU/ml). Scale bar, 20  $\mu$ m. Zoom scale bar, 1  $\mu$ m.

B Percent colocalization of vDNA foci detected by click chemistry to PML at 60 mpi in P6 dermal fibroblasts infected with HSV-1<sup>EdC</sup> in the presence or absence of IFN $\alpha$  (600 IU/ml). Each point represents the percentage of 20 vDNA foci that colocalized to PML from 3 biological replicates.

Data information: Data represent the mean  $\pm$  SEM. Statistical comparisons were made using a Mann–Whitney test (ns not significant).

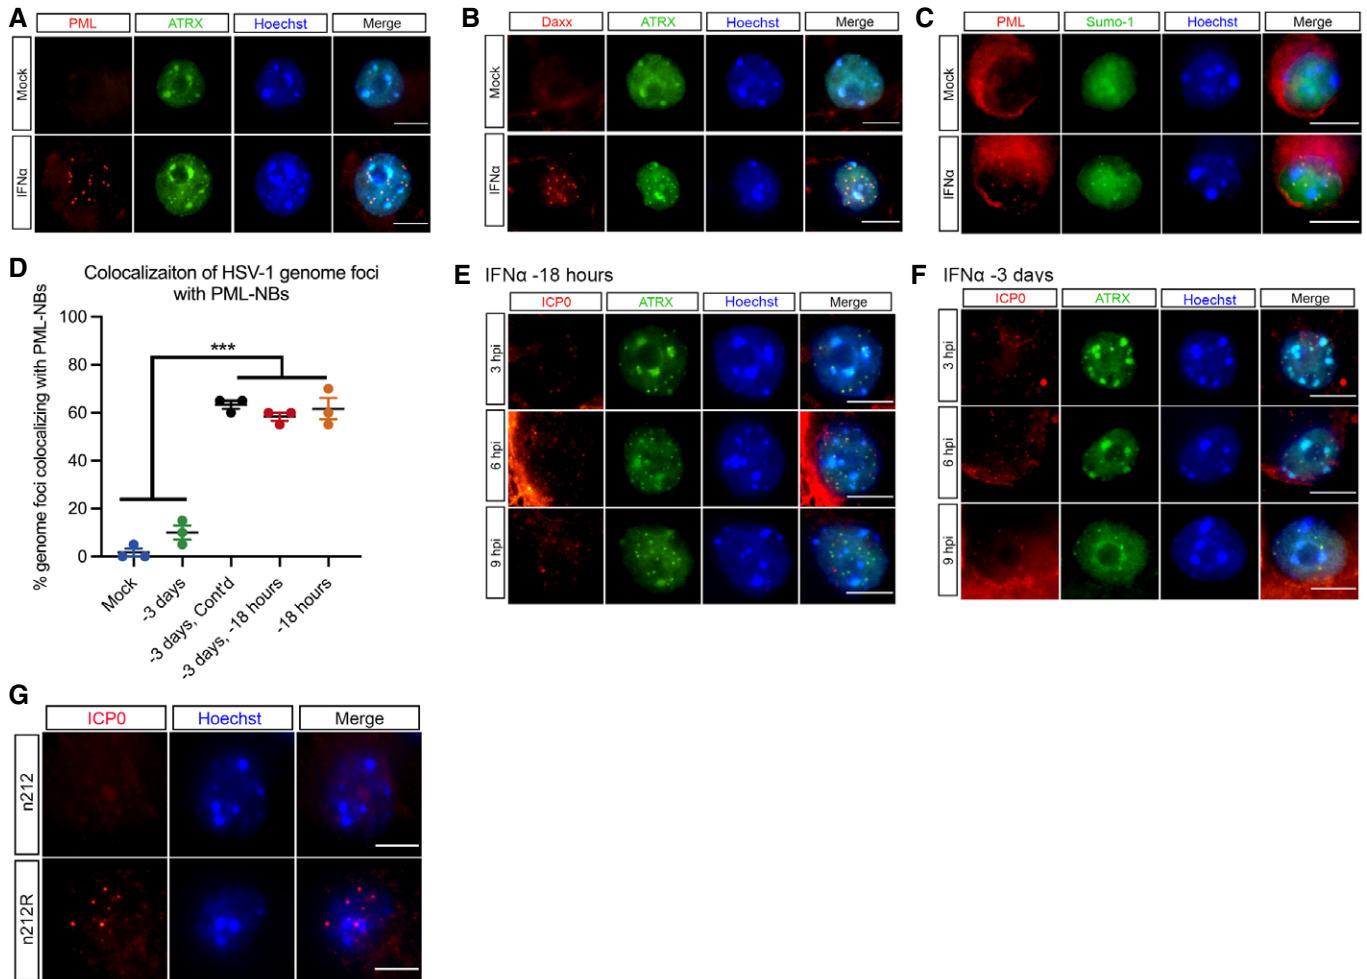

**Figure EV4. HSV-1 genomes only associate with PML-NBs when type I IFN is present during initial infection.**

- A Representative images of untreated or IFN $\alpha$ -treated (600 IU/ml) P6 SCG neurons stained for PML and ATRX at 3 days post-treatment.
- B Representative images of untreated or IFN $\alpha$ -treated (600 IU/ml) P6 SCG neurons stained for Daxx and ATRX at 3 days post-treatment.
- C Representative images of untreated or IFN $\alpha$ -treated (600 IU/ml) P6 SCG neurons stained for PML and SUMO-1 at 3 days post-treatment.
- D Percent colocalization of vDNA foci detected by click chemistry to PML at 3 dpi in SCG neurons infected with HSV-1<sup>EdC</sup> with or without IFN $\alpha$  (600 IU/ml) present at the time of infection. Each point represents the percentage of 20 vDNA foci that colocalized to PML from 3 biological replicates.
- E, F Representative images of HSV-1-infected P6 SCG neurons treated with IFN $\alpha$  (600 IU/ml) for 18 h prior to infection or for 18 h at 3 days prior to infection and stained for ICP0 and ATRX at 3, 6, and 9 h post-infection.
- G Representative images of P6 SCG neurons infected with n212 or n212R for 8 h and stained for HSV-1 ICP0.

Data information: Scale bars, 20  $\mu$ m. Data represent the mean  $\pm$  SEM. Statistical comparisons were made using a Mann-Whitney test (\*\* $P$  < 0.001).

**Figure EV5. PML is not required for ISG induction in primary postnatal sympathetic neurons.**

- A P6 SCG neurons were transduced with either control non-targeting shRNA or shRNA targeting PML for 3 days, then treated with IFN $\alpha$  (600 IU/ml) for 18 h. Total genes > 1.5-fold higher in IFN $\alpha$  (600 IU/ml) treated cells than untreated cells were subdivided into 3 groups: shCtrl-treated neurons only, shPML-treated neurons only. Both shCtrl and shPML neurons (shared).
- B Gene expression heat map of top 50 most upregulated genes in P6 neurons transduced with control non-targeting shRNA or shRNA targeting PML for 3 days, then treated with IFN $\alpha$  (600 IU/ml) for 18 h.
- C Heat map of the top 25 shared upregulated GO terms in P6 neurons transduced with control non-targeting shRNA or shRNA targeting PML for 3 days, then treated with IFN $\alpha$  for 18 h.
- D, E RT-qPCR for *Pml* mRNA expression in SCG neurons transduced with either control non-targeting shRNA or shRNA targeting PML for 3 days, then treated with IFN $\alpha$  (600 IU/ml) for 18 h.  $n = 9$  biological replicates.
- F Quantification of detectable, IFN $\alpha$  (600 IU/ml)-induced PML puncta in P6 SCG neurons treated with ATO (1  $\mu$ M) for 2, 6, 18, and 24 h.  $n = 20$  cells from 2 biological replicates.
- G Number of Us11-GFP expressing neurons at 3 days post-treatment with LY294002 (20  $\mu$ M), ATO (1  $\mu$ M) or LY294002 (20  $\mu$ M) + ATO (1  $\mu$ M) in P6 SCG neuronal cultures infected with HSV-1 in the presence or absence of IFN $\alpha$  (600 IU/ml).  $n = 12$  biological replicates.

Data information: Data represent the mean  $\pm$  SEM. Statistical comparisons were made using a one-way ANOVA with Tukey's multiple comparison (D–F) or a 2-way ANOVA (G) (ns not significant, \*\*\* $P < 0.001$ , \*\*\*\* $P < 0.0001$ ).

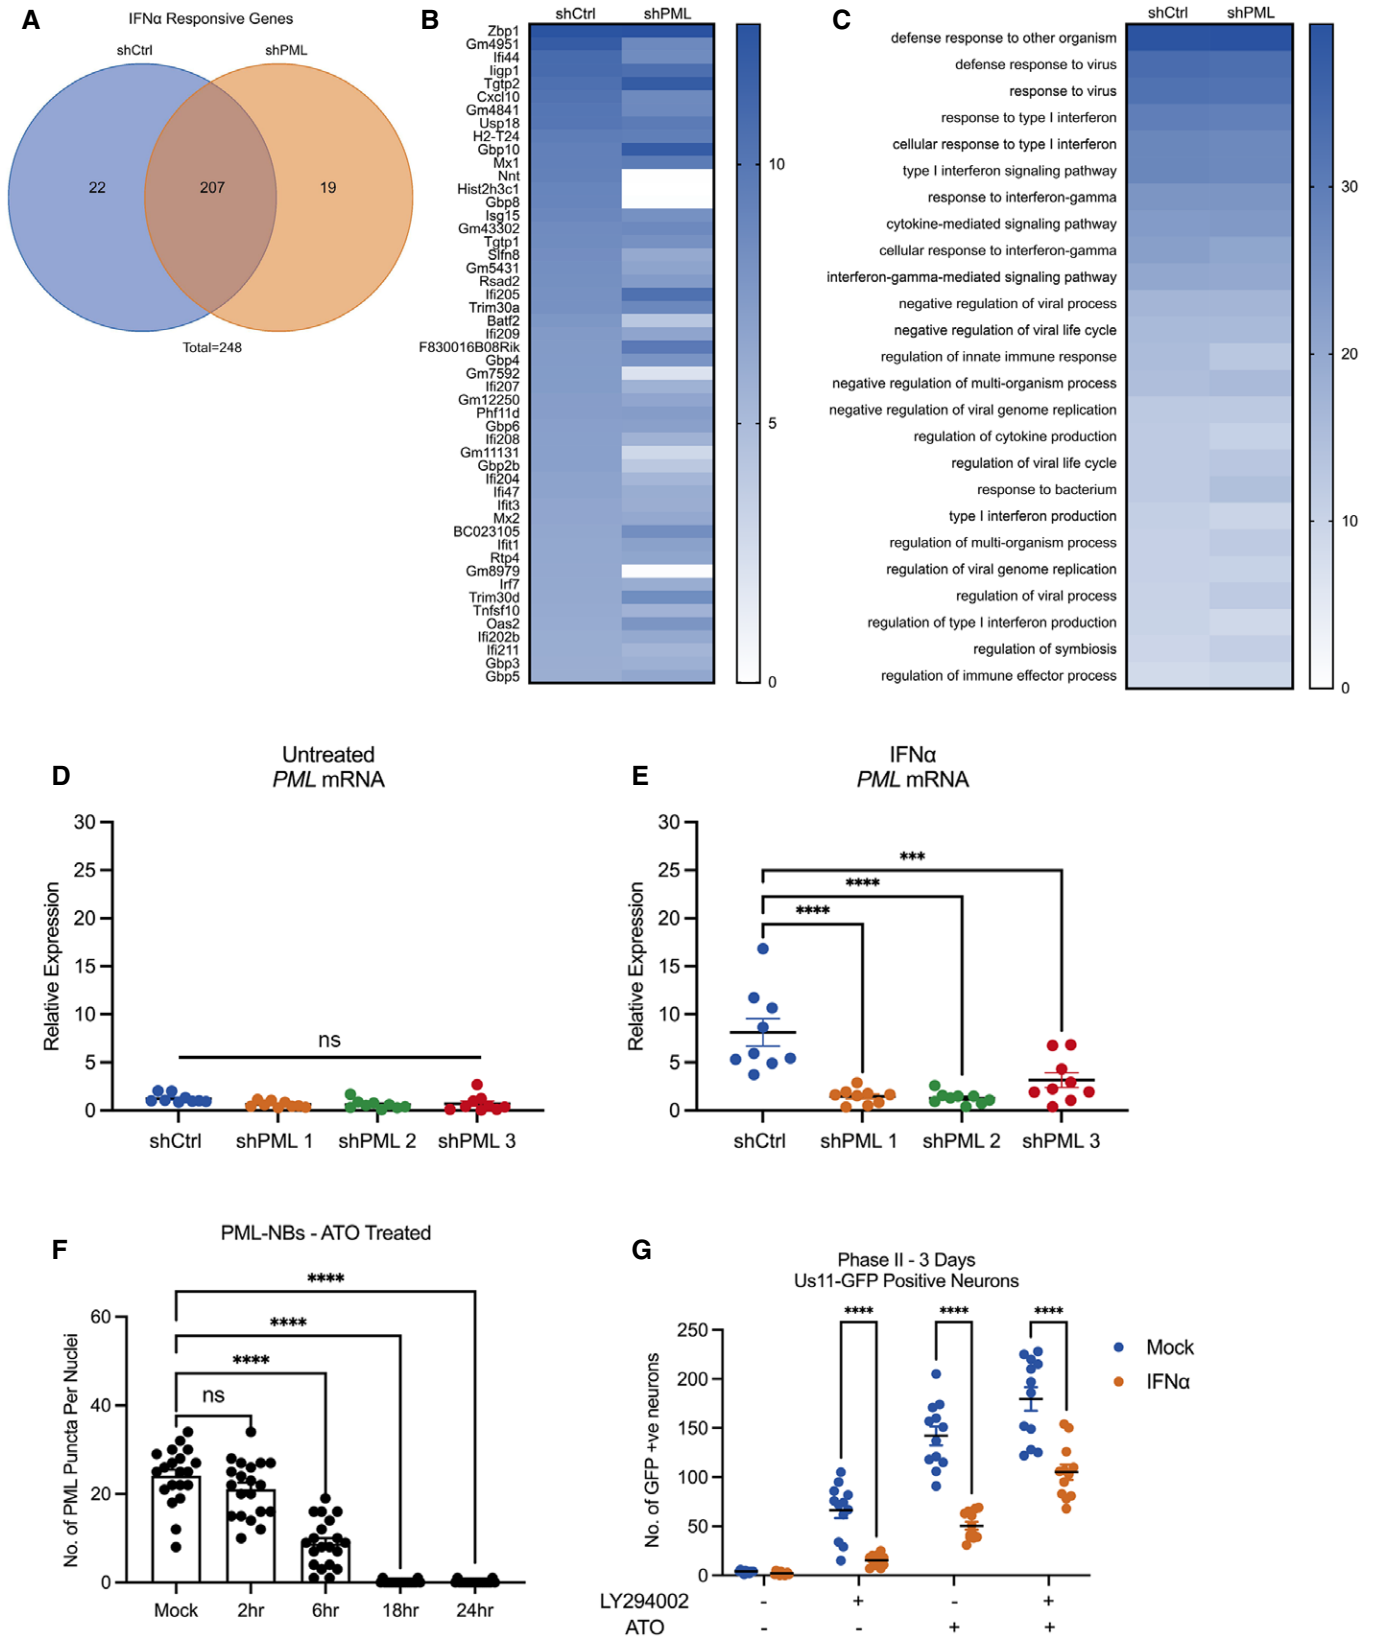

Figure EV5.
